# Supplementary material for: Loss of KEAP1 Causes an Accumulation of Nondegradative Organelles
Source: MDPI journal article supplement (doi:10.3390/antiox11071398), 2022-07-19
Supplement: s1 [file s1]

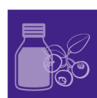

Supplementary material to:

# Loss of KEAP1 Causes an Accumulation of Nondegradative Organelles

Elisabet Uribe-Carretero <sup>1,2,3</sup>, Guadalupe Martínez-Chacón <sup>1,2,3</sup>, Sokhna M. S. Yakhine-Diop <sup>2</sup>, Gema Duque-González <sup>1</sup>, Mario Rodríguez-Arribas <sup>1</sup>, Eva Alegre-Cortés <sup>1,2,3</sup>, Marta Paredes-Barquero <sup>1,2,3</sup>, Saray Canales-Cortés <sup>1,2,3</sup>, Elisa Pizarro-Estrella <sup>1</sup>, Antonio Cuadrado <sup>2,4,5,6</sup>, Rosa Ana González-Polo <sup>1,2,3,\*</sup>, José M. Fuentes <sup>1,2,3,\*</sup> and Mireia Niso-Santano <sup>1,2,3,\*</sup>

- <sup>1</sup> Departamento de Bioquímica y Biología Molecular y Genética, Facultad de Enfermería y Terapia Ocupacional, Universidad de Extremadura, 10003 Cáceres, Spain; euribec@unex.es (E.U.-C.); gmartinezchacon@hotmail.com (G.M.-C.); geduqueg@unex.es (G.D.-G.); mariora@unex.es (M.R.-A.); evalegrec@unex.es (E.A.-C.); martapb@unex.es (M.P.-B.); sacanalec@unex.es (S.C.-C.); osyris\_tng@hotmail.com (E.P.-E.)
- <sup>2</sup> Centro de Investigación Biomédica en Red en Enfermedades Neurodegenerativas (CIBERNED), 28029 Madrid, Spain; smsyakhinediop@unex.es (S.M.S.Y.-D.); antonio.cuadrado@uam.es (A.C.)
- <sup>3</sup> Instituto Universitario de Investigación Biosanitaria de Extremadura (INUBE), 10003 Cáceres, Spain
- <sup>4</sup> Departamento de Bioquímica, Facultad de Medicina, Universidad Autónoma de Madrid (UAM), 28049 Madrid, Spain
- <sup>5</sup> Instituto de Investigaciones Biomédicas Alberto Sols (CSIC-UAM), 28029 Madrid, Spain
- <sup>6</sup> Instituto de Investigación Sanitaria La Paz (IdiPaz), 28029 Madrid, Spain
- \* Correspondence: rosapol@unex.es (R.A.G.-P.); jfuentes@unex.es (J.M.F.); mnisosan@unex.es (M.N.-S.)

**Citation:** Uribe-Carretero, E.; Martínez-Chacón, G.; Yakhine-Diop, S.M.S.; Duque-González, G.; Rodríguez-Arribas, M.; Alegre-Cortés, E.; Paredes-Barquero, M.; Canales-Cortés, S.; Pizarro-Estrella, E.; Cuadrado, A.; et al. Loss of KEAP1 Causes an Accumulation of Nondegradative Organelles. *Antioxidants* **2022**, *11*, 1398. <https://doi.org/10.3390/antiox11071398>

Academic Editor: Young-Sam Keum

Received: 24 June 2022

Accepted: 15 July 2022

Published: 19 July 2022

**Publisher's Note:** MDPI stays neutral with regard to jurisdictional claims in published maps and institutional affiliations.

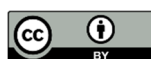

**Copyright:** © 2022 by the authors. Licensee MDPI, Basel, Switzerland. This article is an open access article distributed under the terms and conditions of the Creative Commons Attribution (CC BY) license (<https://creativecommons.org/licenses/by/4.0/>).

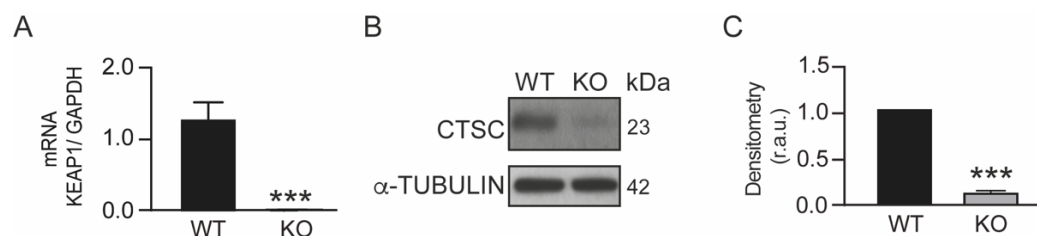

**Figure S1.** KEAP1-deficient cells show LAMP1-labeled vesicles with reduced CTSC protein levels. (A) WT and *Keap1*<sup>KO</sup> MEFs RNA was extracted, and real-time quantitative PCR was performed for KEAP1 gene. GAPDH was used as an endogenous control of gene expression. The histogram shows the mean  $\pm$  SD of at least three independent experiments. (B) Cell lysates from WT and *Keap1*<sup>KO</sup> MEFs were analyzed by western blot using anti-CTSC antibody.  $\alpha$ -tubulin was used as a loading control. (C) Densitometry was employed to quantify the abundance of CTSC. r.a.u. means relative arbitrary units. All data are the mean  $\pm$  of at least three independent experiments and they were compared by Student's t-test (\*\*\*)  $p < 0.001$  versus WT cells).

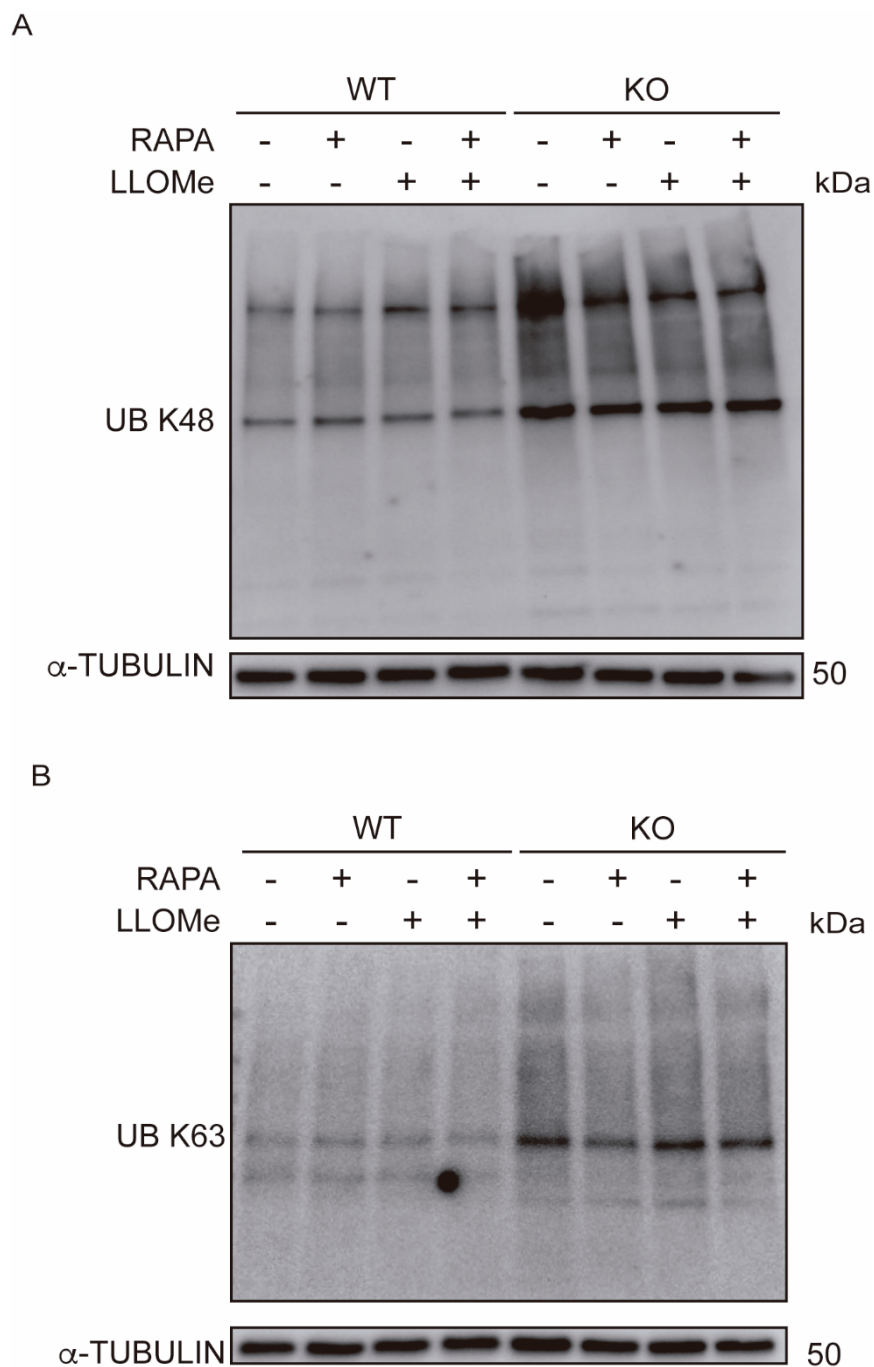

**Figure S2.** KEAP1 deficiency induces ubiquitinated protein accumulation. (**A,B**) WT and Keap1<sup>KO</sup> MEFs were cultured in control conditions, incubated with 1mM LLOMe or treated with 1 mM rapamycin (RAPA) alone or in combination with 1 mM LLOMe. UB K63 and UB K48 were assessed by immunoblotting.  $\alpha$ -tubulin was used as a loading control.
